# Supplementary material for: The Role of Polyunsaturated Fatty Acids in Osteoarthritis: Insights from a Mendelian Randomization Study
Source: MDPI journal article supplement (doi:10.3390/nu15224787), 2023-11-15
Supplement: s1 [file s1]

## Supplementary Tables

**Table S1: Instrumental variables of Omega-3 fatty acids for knee osteoarthritis and hip osteoarthritis.**

| SNP         | effect_allele | other_allele | beta   | eaf   | se    | F        |
|-------------|---------------|--------------|--------|-------|-------|----------|
| rs10096633  | T             | C            | -0.039 | 0.124 | 0.006 | 99.027   |
| rs10162642  | A             | G            | -0.049 | 0.210 | 0.005 | 237.809  |
| rs10184054  | G             | C            | -0.036 | 0.224 | 0.005 | 138.023  |
| rs11242109  | T             | G            | 0.024  | 0.479 | 0.004 | 87.590   |
| rs112875651 | A             | G            | -0.087 | 0.392 | 0.004 | 1071.996 |
| rs11563251  | T             | C            | 0.035  | 0.111 | 0.006 | 72.960   |
| rs11681659  | T             | C            | -0.025 | 0.716 | 0.004 | 78.449   |
| rs117143374 | C             | T            | -0.037 | 0.142 | 0.006 | 100.665  |
| rs1260326   | C             | T            | -0.082 | 0.604 | 0.004 | 976.166  |
| rs12914626  | T             | C            | -0.059 | 0.702 | 0.004 | 440.894  |
| rs12976395  | C             | G            | 0.029  | 0.505 | 0.004 | 108.121  |
| rs13424225  | T             | G            | 0.022  | 0.450 | 0.004 | 73.339   |
| rs139974673 | C             | T            | 0.118  | 0.026 | 0.013 | 212.235  |
| rs144018203 | C             | G            | 0.107  | 0.011 | 0.020 | 68.367   |
| rs157592    | C             | A            | 0.028  | 0.185 | 0.005 | 70.257   |
| rs1672811   | C             | T            | 0.025  | 0.748 | 0.005 | 71.907   |
| rs16940904  | T             | C            | -0.036 | 0.227 | 0.005 | 132.706  |
| rs1800978   | G             | C            | -0.037 | 0.124 | 0.006 | 90.880   |
| rs182611493 | G             | A            | -0.210 | 0.013 | 0.020 | 286.560  |
| rs2072114   | G             | A            | -0.320 | 0.123 | 0.006 | 6746.634 |
| rs2131925   | T             | G            | 0.071  | 0.646 | 0.004 | 704.494  |
| rs2269928   | G             | T            | -0.154 | 0.226 | 0.005 | 2439.528 |
| rs2278426   | T             | C            | -0.073 | 0.035 | 0.011 | 108.292  |
| rs2394976   | T             | G            | -0.046 | 0.162 | 0.006 | 175.485  |
| rs261291    | C             | T            | 0.113  | 0.356 | 0.004 | 1783.202 |
| rs34707604  | C             | T            | 0.046  | 0.259 | 0.005 | 221.129  |
| rs35135293  | T             | C            | -0.021 | 0.517 | 0.004 | 65.427   |
| rs4000713   | A             | G            | -0.029 | 0.295 | 0.004 | 104.402  |
| rs4367411   | T             | C            | 0.031  | 0.207 | 0.005 | 83.753   |
| rs4704834   | G             | A            | 0.029  | 0.644 | 0.004 | 116.729  |
| rs5112      | G             | C            | 0.048  | 0.534 | 0.004 | 297.528  |
| rs55891451  | C             | A            | 0.034  | 0.202 | 0.005 | 113.214  |
| rs58542926  | T             | C            | -0.172 | 0.074 | 0.008 | 1226.261 |
| rs58983615  | T             | A            | -0.099 | 0.020 | 0.015 | 111.534  |
| rs6129624   | A             | G            | -0.026 | 0.335 | 0.004 | 86.527   |

|            |   |   |        |       |       |         |
|------------|---|---|--------|-------|-------|---------|
| rs62466318 | T | C | -0.072 | 0.204 | 0.005 | 507.465 |
| rs629301   | T | G | 0.038  | 0.778 | 0.005 | 153.707 |
| rs6601924  | C | T | 0.035  | 0.846 | 0.006 | 96.682  |
| rs6693447  | G | T | 0.023  | 0.462 | 0.004 | 79.207  |
| rs673335   | C | T | -0.067 | 0.160 | 0.006 | 365.572 |
| rs72789541 | A | T | -0.081 | 0.296 | 0.004 | 826.638 |
| rs73109460 | A | G | -0.035 | 0.124 | 0.006 | 79.047  |
| rs74945822 | A | G | -0.048 | 0.143 | 0.006 | 166.085 |
| rs76376981 | C | G | -0.149 | 0.046 | 0.010 | 558.638 |
| rs7924036  | T | G | 0.023  | 0.504 | 0.004 | 82.553  |
| rs7970695  | A | G | -0.025 | 0.621 | 0.004 | 90.944  |
| rs9295128  | T | G | -0.130 | 0.017 | 0.016 | 164.385 |
| rs964184   | C | G | -0.117 | 0.867 | 0.006 | 956.146 |
| rs9947684  | G | A | 0.042  | 0.654 | 0.004 | 245.697 |
| rs9963974  | A | T | 0.031  | 0.319 | 0.004 | 124.368 |
| rs9987289  | G | A | 0.057  | 0.909 | 0.007 | 160.754 |

**Table S2: Instrumental variables of Omega-6 fatty acids for knee osteoarthritis.**

| SNP         | effect_allele | other_allele | beta   | eaf   | se    | F        |
|-------------|---------------|--------------|--------|-------|-------|----------|
| rs1002687   | A             | G            | 0.091  | 0.645 | 0.004 | 1166.075 |
| rs1065853   | T             | G            | -0.199 | 0.081 | 0.007 | 1783.454 |
| rs1081105   | C             | A            | 0.119  | 0.028 | 0.012 | 231.989  |
| rs11239588  | G             | A            | 0.029  | 0.268 | 0.005 | 97.879   |
| rs112875651 | A             | G            | -0.064 | 0.392 | 0.004 | 578.357  |
| rs114863007 | A             | G            | -0.046 | 0.095 | 0.007 | 108.884  |
| rs115478735 | T             | A            | 0.042  | 0.183 | 0.005 | 164.256  |
| rs11789603  | T             | C            | 0.048  | 0.109 | 0.006 | 136.084  |
| rs11854242  | T             | C            | -0.038 | 0.275 | 0.005 | 178.650  |
| rs1260326   | C             | T            | -0.064 | 0.604 | 0.004 | 607.683  |
| rs12740374  | T             | G            | -0.057 | 0.221 | 0.005 | 348.097  |
| rs13108218  | G             | A            | -0.035 | 0.615 | 0.004 | 177.350  |
| rs141469619 | G             | A            | 0.111  | 0.010 | 0.021 | 67.295   |
| rs142158911 | A             | G            | -0.094 | 0.117 | 0.006 | 558.348  |
| rs1461729   | G             | A            | 0.084  | 0.899 | 0.007 | 388.137  |
| rs1800961   | T             | C            | -0.074 | 0.030 | 0.012 | 99.886   |
| rs183130    | T             | C            | 0.062  | 0.324 | 0.004 | 509.111  |
| rs1883711   | C             | G            | 0.092  | 0.031 | 0.012 | 151.489  |
| rs200730299 | C             | A            | -0.037 | 0.194 | 0.005 | 113.569  |
| rs2378390   | A             | G            | -0.033 | 0.141 | 0.006 | 82.036   |
| rs261290    | C             | T            | -0.097 | 0.655 | 0.004 | 1290.077 |

|            |   |   |        |       |       |          |
|------------|---|---|--------|-------|-------|----------|
| rs2737245  | T | G | -0.027 | 0.279 | 0.005 | 92.905   |
| rs2740488  | C | A | -0.050 | 0.265 | 0.005 | 299.750  |
| rs28383314 | C | T | 0.039  | 0.623 | 0.004 | 218.170  |
| rs2986164  | A | G | -0.025 | 0.536 | 0.004 | 80.426   |
| rs34121855 | G | T | -0.050 | 0.204 | 0.005 | 243.995  |
| rs35603463 | C | T | 0.034  | 0.567 | 0.005 | 120.765  |
| rs3734854  | A | G | 0.048  | 0.065 | 0.008 | 84.390   |
| rs3770586  | T | C | -0.023 | 0.484 | 0.004 | 80.363   |
| rs3817335  | A | T | -0.028 | 0.351 | 0.004 | 108.508  |
| rs4008004  | A | C | 0.033  | 0.222 | 0.005 | 114.291  |
| rs4299376  | T | G | -0.035 | 0.676 | 0.004 | 167.854  |
| rs4439799  | T | C | 0.022  | 0.502 | 0.004 | 76.823   |
| rs4704210  | C | G | 0.047  | 0.374 | 0.004 | 314.350  |
| rs4766578  | A | T | 0.028  | 0.503 | 0.004 | 118.166  |
| rs4860948  | A | T | 0.028  | 0.244 | 0.005 | 87.894   |
| rs486142   | A | G | 0.030  | 0.517 | 0.004 | 141.944  |
| rs534417   | G | A | 0.039  | 0.875 | 0.006 | 103.166  |
| rs56322906 | A | G | -0.100 | 0.035 | 0.011 | 209.766  |
| rs5754102  | A | C | -0.032 | 0.183 | 0.005 | 89.764   |
| rs58542926 | T | C | -0.128 | 0.074 | 0.008 | 693.781  |
| rs633695   | G | A | 0.073  | 0.292 | 0.004 | 663.976  |
| rs6471717  | A | G | -0.029 | 0.663 | 0.004 | 115.170  |
| rs6547409  | T | C | -0.081 | 0.051 | 0.009 | 193.510  |
| rs6602911  | T | C | 0.026  | 0.360 | 0.004 | 93.976   |
| rs672889   | G | T | 0.076  | 0.860 | 0.006 | 433.088  |
| rs6882345  | A | G | 0.045  | 0.633 | 0.004 | 288.401  |
| rs6934962  | T | C | 0.023  | 0.400 | 0.004 | 77.043   |
| rs6938647  | C | A | -0.048 | 0.782 | 0.005 | 236.919  |
| rs7139079  | A | G | -0.030 | 0.593 | 0.004 | 130.578  |
| rs72997616 | A | C | -0.052 | 0.094 | 0.007 | 137.940  |
| rs740516   | G | C | -0.032 | 0.151 | 0.006 | 77.841   |
| rs75406471 | A | G | -0.031 | 0.155 | 0.006 | 78.924   |
| rs7750288  | G | A | 0.025  | 0.285 | 0.004 | 77.995   |
| rs77960347 | G | A | 0.276  | 0.013 | 0.018 | 611.776  |
| rs7831074  | G | C | 0.028  | 0.759 | 0.005 | 76.063   |
| rs79429216 | A | G | 0.151  | 0.013 | 0.018 | 176.327  |
| rs870526   | T | C | -0.032 | 0.521 | 0.004 | 155.868  |
| rs9295128  | T | G | -0.196 | 0.017 | 0.016 | 378.873  |
| rs9304381  | T | C | 0.070  | 0.818 | 0.005 | 449.938  |
| rs9616847  | T | A | 0.024  | 0.388 | 0.004 | 82.058   |
| rs964184   | C | G | -0.139 | 0.867 | 0.006 | 1365.365 |

---

**Table S3: Instrumental variables of Omega-6 fatty acids for hip osteoarthritis.**

| SNP         | effect_allele | other_allele | beta   | eaf   | se    | F        |
|-------------|---------------|--------------|--------|-------|-------|----------|
| rs1002687   | A             | G            | 0.091  | 0.645 | 0.004 | 1166.075 |
| rs1065853   | T             | G            | -0.199 | 0.081 | 0.007 | 1783.454 |
| rs1081105   | C             | A            | 0.119  | 0.028 | 0.012 | 231.989  |
| rs11239588  | G             | A            | 0.029  | 0.268 | 0.005 | 97.879   |
| rs112875651 | A             | G            | -0.064 | 0.392 | 0.004 | 578.357  |
| rs115478735 | T             | A            | 0.042  | 0.183 | 0.005 | 164.256  |
| rs11789603  | T             | C            | 0.048  | 0.109 | 0.006 | 136.084  |
| rs11854242  | T             | C            | -0.038 | 0.275 | 0.005 | 178.650  |
| rs1260326   | C             | T            | -0.064 | 0.604 | 0.004 | 607.683  |
| rs12740374  | T             | G            | -0.057 | 0.221 | 0.005 | 348.097  |
| rs13108218  | G             | A            | -0.035 | 0.615 | 0.004 | 177.350  |
| rs141469619 | G             | A            | 0.111  | 0.010 | 0.021 | 67.295   |
| rs142158911 | A             | G            | -0.094 | 0.117 | 0.006 | 558.348  |
| rs1461729   | G             | A            | 0.084  | 0.899 | 0.007 | 388.137  |
| rs1800961   | T             | C            | -0.074 | 0.030 | 0.012 | 99.886   |
| rs183130    | T             | C            | 0.062  | 0.324 | 0.004 | 509.111  |
| rs1883711   | C             | G            | 0.092  | 0.031 | 0.012 | 151.489  |
| rs200730299 | C             | A            | -0.037 | 0.194 | 0.005 | 113.569  |
| rs2378390   | A             | G            | -0.033 | 0.141 | 0.006 | 82.036   |
| rs261290    | C             | T            | -0.097 | 0.655 | 0.004 | 1290.077 |
| rs2737245   | T             | G            | -0.027 | 0.279 | 0.005 | 92.905   |
| rs2740488   | C             | A            | -0.050 | 0.265 | 0.005 | 299.750  |
| rs28383314  | C             | T            | 0.039  | 0.623 | 0.004 | 218.170  |
| rs2986164   | A             | G            | -0.025 | 0.536 | 0.004 | 80.426   |
| rs34121855  | G             | T            | -0.050 | 0.204 | 0.005 | 243.995  |
| rs35603463  | C             | T            | 0.034  | 0.567 | 0.005 | 120.765  |
| rs3734854   | A             | G            | 0.048  | 0.065 | 0.008 | 84.390   |
| rs3770586   | T             | C            | -0.023 | 0.484 | 0.004 | 80.363   |
| rs3817335   | A             | T            | -0.028 | 0.351 | 0.004 | 108.508  |
| rs4008004   | A             | C            | 0.033  | 0.222 | 0.005 | 114.291  |
| rs4299376   | T             | G            | -0.035 | 0.676 | 0.004 | 167.854  |
| rs4439799   | T             | C            | 0.022  | 0.502 | 0.004 | 76.823   |
| rs4704210   | C             | G            | 0.047  | 0.374 | 0.004 | 314.350  |
| rs4766578   | A             | T            | 0.028  | 0.503 | 0.004 | 118.166  |
| rs4860948   | A             | T            | 0.028  | 0.244 | 0.005 | 87.894   |
| rs486142    | A             | G            | 0.030  | 0.517 | 0.004 | 141.944  |
| rs534417    | G             | A            | 0.039  | 0.875 | 0.006 | 103.166  |
| rs56322906  | A             | G            | -0.100 | 0.035 | 0.011 | 209.766  |
| rs5754102   | A             | C            | -0.032 | 0.183 | 0.005 | 89.764   |
| rs58542926  | T             | C            | -0.128 | 0.074 | 0.008 | 693.781  |
| rs633695    | G             | A            | 0.073  | 0.292 | 0.004 | 663.976  |

|            |   |   |        |       |       |          |
|------------|---|---|--------|-------|-------|----------|
| rs6471717  | A | G | -0.029 | 0.663 | 0.004 | 115.170  |
| rs6547409  | T | C | -0.081 | 0.051 | 0.009 | 193.510  |
| rs6602911  | T | C | 0.026  | 0.360 | 0.004 | 93.976   |
| rs672889   | G | T | 0.076  | 0.860 | 0.006 | 433.088  |
| rs6882345  | A | G | 0.045  | 0.633 | 0.004 | 288.401  |
| rs6938647  | C | A | -0.048 | 0.782 | 0.005 | 236.919  |
| rs7139079  | A | G | -0.030 | 0.593 | 0.004 | 130.578  |
| rs72997616 | A | C | -0.052 | 0.094 | 0.007 | 137.940  |
| rs740516   | G | C | -0.032 | 0.151 | 0.006 | 77.841   |
| rs75406471 | A | G | -0.031 | 0.155 | 0.006 | 78.924   |
| rs7750288  | G | A | 0.025  | 0.285 | 0.004 | 77.995   |
| rs77960347 | G | A | 0.276  | 0.013 | 0.018 | 611.776  |
| rs7831074  | G | C | 0.028  | 0.759 | 0.005 | 76.063   |
| rs79429216 | A | G | 0.151  | 0.013 | 0.018 | 176.327  |
| rs870526   | T | C | -0.032 | 0.521 | 0.004 | 155.868  |
| rs9295128  | T | G | -0.196 | 0.017 | 0.016 | 378.873  |
| rs9304381  | T | C | 0.070  | 0.818 | 0.005 | 449.938  |
| rs9616847  | T | A | 0.024  | 0.388 | 0.004 | 82.058   |
| rs964184   | C | G | -0.139 | 0.867 | 0.006 | 1365.365 |

---
